# Supplementary material
Source: PubMed Central journal article supplement (PMC1864979)
Supplement: 7601681s1.pdf [file 7601681s1.pdf]

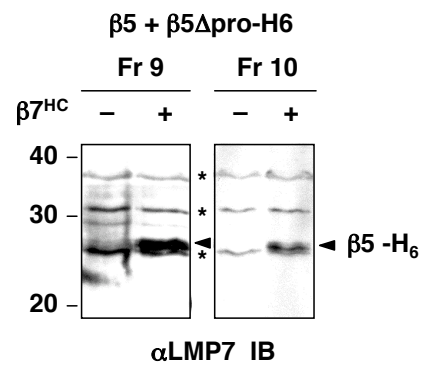

Supplementary Fig. S1. Li et al.



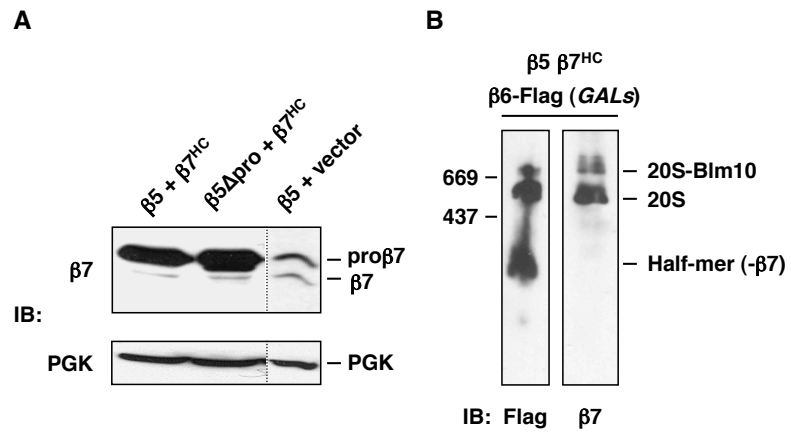

Supplementary Fig. S3. Li et al.

HsPAC1 1 MAATFFG**B**VV-KAPCRAGTE**D**EE**E**EE**E**-GRRETP**E**DRE**V**RLQLARKRE-VRLLR**Q**TKTS  
MmPAC1 1 MAATFFG**B**VV-KAPCRAGTE**E**EE**E**EE**E**QSRRT**P**EDRE**V**VRQLARKRE-VRLLR**Q**TETS  
GgPAC1 1 -MATFFG**B**VV-VAPSRAGVD**D**EE**E**TE**E**--T---A**E**DRE**I**RRELQEK**R**---E**I**TALW**T**PGA  
ScPba1 1 ---MLFK**Q**WN-D**L**PE**P**K**H**LL**D**L**F**E**I**SK--N---LQ**S**LE**V**CPVPK**V**EF**P**-Q**D**L**D**V**P**Q**Y**STA  
SpPba1 1 ---MLFK**Q**WN-D**L**PE**P**K**H**LL**D**L**F**E**I**SN--N---LQ**S**LE**V**CPVPK**V**EF**P**-Q**D**L**D**V**S**Q**Y**STV  
DrPAC1 1 -MATFFG**B**V**L**-S**V**YSRAVEE**D**E**D**MTNEN---E**D**E**O**I**R**EIEEK**R**-----S-VEVCW  
KlPba1 1 --M**L**T**F**K**Q**W**Q**-N**D**Q**V**P**R**H**O**I**D**P**V**V**S**D-----P**Y**SL**V**N**K**T**P**T**V**T**I**E**P**ES**L**DIS**P**Y**N**H**C**  
YlPba1 1 ---M**Q**L**K**P**W**L-Q**V**NS**P**R**H**I**E**E**G**H**E**G-----F**E**D**G**Q**E**AS**P**Y**T**K**S**V**L**F**A**NS**L**TH**P**T**S**P**Q**T  
UmPba1 1 ---M**E**F**D**P**V**N**R**D**V**P**A**R**Y**E**L**ES**G**SE**D**E-----W**E**H**N**V**N**ES**Q**H**P**Y**T**L**V**A**A**D**A**L**P**Q**S**Q**L**T

HsPAC1 58 LE**V**S**L**LE**K**Y**P**C**S**K**F**I**I**A**I**G**N**NA**V**A**F**L**S**S**F**V**M**N**S**G**V**W**E**E**V**G**C**A**K**L**W**NE**W**C**R**I**T**D--T**T**H**L**S  
MmPAC1 59 LE**A**V**L**LE**T**H**P**C**S**K**F**I**I**A**V**G**S**NA**T**A**F**L**S**A**F**V**M**N**S**G**V**W**E**E**V**G**C**A**K**L**W**NE**W**C**R**I**T**D--T**V**R**L**S  
GgPAC1 51 A**G**S**P**A**E**E**P**L**R**C**S**F**F**I**V**A**V**G**H**NA**V**A**F**L**S**A**F**I**L**D**S**V**C**W**K**I**V**G**A**V**K**L**W**NE**W**C**O**T**T**N--A**T**S**V**L  
ScPba1 51 V**I**T**I**K**I**M**N**P**L**F**K**N**L**I**O**L**T**S**I**C**E**I**K**T**L**T**V**K**S**P**S**L**P**Q**S**S**G**-K**H**S**W**N**Y**D**E**N**F**P**N**--E**V**D**P**D  
SpPba1 51 V**I**T**I**K**I**M**N**P**L**F**K**N**L**I**O**L**T**S**I**C**E**I**K**T**L**T**V**K**S**P**P**L**Q**P**S**G-E**H**S**W**N**Y**D**E**N**F**P**N**--E**V**D**P**D  
DrPAC1 49 L**I**G**S**Q**D**G**P**L**Q**C**S**D**L**I**I**C**A**G**P**NA**S**G**F**I**R**A**L**L**S**I**V**G**W**T**A**V**A**W**L**S**F**W**N**E**R**S**R**G**S**E**R**P**T**V**V**P**G**  
KlPba1 52 I**V**L**P**T**S**L**K**W**L**L**P**K**S**I**I**N**V**H**I**C**I**S**G**L**S**N**N**-----E**W**E**S**M**K**P**V**P**G**---M**Y**D**T**  
YlPba1 52 L**L**V**S**T**A**K**L**F**P**V**E**A**L**F**T**Q**K**S**K**P**I**N**L**G**E**I**V**G**E**I**Q**L**K**K**N**A**Q**S---A**E**N**R**R**K**F**T**D**F**L**E**E**D**E  
UmPba1 53 V**L**V**G**S**A**G**A**K**M**L**S**S**L**A**G**E**V**P**S****O**L**S**L**O**S**E**S**E**Q**H**A**A**I**A**V**A**S---S---S**T**G**S**P**I**T**A**L**V**V**P**

HsPAC1 116 S**T**E**A**F**C**V**F**Y**H**L**K**S**N**P**S**V**F**L**C**C**S**C**Y**A**E**D**Q**Q**F**Q**W**L**E**K**V**F**G**S**C**P**R**K**N**M**O**I**T**L**T**C**R**H**V**T**D**Y  
MmPAC1 117 P**T**D**V**F**C**V**F**Y**Q**L**K**S**D**P**S**V**F**L**C**C**S**C**Y**A**E**D**Q**Q**F**Q**W**L**E**K**V**F**G**F**Q**P**R**K**S**M**O**V**T**L**T**C**R**H**V**T**D**Y  
GgPAC1 109 P**T**S**F**C**V**F**Y**Q**L**I**S**D**P**T**V**L**C**C**S**C**Y**A**E**D**Q**Q**F**Q**W**L**E**K**V**F**G**H**I**G**K**E**G**L**Q**V**T**L**S**T**C**P**A**E**Y**  
ScPba1 108 Q**K**N**D**A**E**T**V**Y**G**S**F**P**L**Y**S**F**G**K**L**L**L**F**S**M**E**N**F**I**S**S**P**I**F**G**N**-----M**I**S**R**S**I**I**S**Q  
SpPba1 108 Q**K**S**A**I**S**D**E**T**T**Y**G**S**F**P**L**Y**S**F**G**K**L**L**L**F**S**M**E**N**F**I**S**S**P**I**F**G**N**-----M**I**S**R**S**I**I**S**Q  
DrPAC1 109 P**G**E**P**S**C**L**Y**R**L**E**S**C**P**T**V**L**C**C**Q**G**F**A**E**D**Q**L**E**Q**F**T**E**K**V**F**S**C**V**Q**T**R**D**L**N**V**T**L**S**D**C**S**S**A**D**Y  
KlPba1 98 E**E**H**I**N**S**T**E**Q**F**V**I**H**Y**N**W**R**L**E**D**L**I**A**I**T**D**E**N**E**V**K**Y**P**A**I**V**T**N**-----F**W**T**R**N**L**A**Q**L**L**R  
YlPba1 109 E**D**L**E**D**V**T**K**E**L**I**S**H**K**V**L**S**P**V**Q**Y**G**D**V**V**L**E**I**K**Q**D**E**L**L**L**A**H**G**--F**A**Q**L**V**D**L**I**K**P**C**Q**A**L**I  
UmPba1 106 P**P**Q**L**R**S**S**R**E**H**D**L**A**H**Q**I**E**A**T**N**P**S**K**I**V**I**D**S**Y**S**P**Q**E**I**Y**R**D**L**D---S**Q**D**D**A**D**C**E**A**P**I**R**Y**L**

HsPAC1 176 K**T**S**E**S**T**G**S**I**P**S**P**L**R**A**L**K**T**Q**N**E**K**D**S**A**C**P**L**L**E**Q**P**N**I**V**H**D**L**P**A**A**V**L**S**Y**C**Q**V**W**K**I**P**A**V**L**Y**L**C**  
MmPAC1 177 K**T**P**E**S**T**C**S**L**S**S**P**L**R**A**L**K**T**Q**T**E**K**D**A**L**C**P**L**L**E**Q**P**N**I**V**H**D**L**S**A**A**V**L**S**Y**C**Q**V**W**K**I**P**A**V**L**Y**L**C**  
GgPAC1 169 K**T**Q**E**S**T**L**T**L**P**S**P**L**K**A**L**K**T**K**E**E**K**E**V**C**P**L**L**E**Q**P**N**I**V**R**D**L**P**A**A**V**L**S**Y**C**Q**V**W**Q**I**P**A**V**L**Y**Q**C  
ScPba1 158 L**A**Q**F**S**P**D**I**I**V**I**G**T**S**D**K**L**A**S**M**K**V**M**T**E**N**E**C**T**L**Q**P**-P**E**F**I**T**G**F**I**G**S**V**L**L**Q**L**I**V**G**P**S**K**G**K**F**K  
SpPba1 158 L**V**K**S**S**P**D**I**I**V**I**G**T**S**D**K**L**N**G**M**K**I**T**T**K**D**E**C**T**L**Q**P**-P**E**F**I**T**G**F**I**G**S**V**L**L**Q**L**I**V**G**A**N**K**M**K**F**K  
DrPAC1 169 K**I**S**D**Y**L**S**G**S**S**I**P**L**R**C**L**K**T**S**T**Y**T**H**T**V**T**C**P**L**L**E**Q**P**N**I**C**S**G**L**A**A**V**L**S**H**C**Q**V**H**Q**I**S**A**V**L**Y**Q**C**  
KlPba1 150 D**I**K**I**T**I**L**V**N**S**D**K**I**T**E**L**K**Q**L**S**L**V**P**P**E**F**I**T**G**S**I**T**N**F**L**A**L**P**R**K**E**L**K**V**I**V**P**S**E**G**P**G**F**E**K  
YlPba1 167 L**A**P**G**N**T**I**A**D**V**H**V**H**Q**L**D**V**G**K**S**N**L**V**P**L**A**S**T**P**L**L**Q**S**P**N**F**I**S**G**L**G**A**A**V**L**I**R**C**Q**Q**S**Q**V**P**A**T**A**L**V**V**  
UmPba1 162 A**S**P**S**Y**T**A**S**H**T**I**D**S**K**R**M**T**F**L**R**A**P**E**S**A**G**G**I**G**A**A**F**L**S**K**A**V**I**S**N**I**P**A**L**L**A**L**L**E**D**V**S**F**O**S**H**I**Q**L**Y**

HsPAC1 236 Y**T**D-----V**M**K**L**D**L**I**T**V**E**A**F**K**P**I**L**S**T**R**S**L**K**G**L**V**E**N**I**P**Q**S**T**E**I**L**K**K**L**M**T**T**N**E**I**Q**S**N**I**Y**T**  
MmPAC1 237 Y**T**D-----V**M**K**L**D**R**V**T**V**E**A**F**K**P**L**L**S**S**R**S**L**K**C**L**V**E**N**I**P**E**S**T**E**I**L**K**K**L**M**T**T**N**E**I**Q**S**N**I**Y**T**  
GgPAC1 229 Y**T**D-----I**K**L**D**A**V**T**I**E**A**F**K**P**L**L**S**S**K**P**L**K**N**L**V**E**D**I**S**E**S**T**K**L**K**L**L**T**G**E**T**H**N**N**T**Y**I**  
ScPba1 217 L**V**A**P**S**E**G**P**N**G**F**E**K**L**S**L**S**D**M**G**S**L**V**D**L**C**G**Q**W**L**G**F**E**P**S**Y**S**E**C**Y**R**L**W**C**D**S**A**A**I**G**A**Q**S**G**L**Y**I  
SpPba1 217 L**V**V**P**S**E**G**P**N**G**F**E**K**L**S**L**S**D**M**G**S**L**V**D**L**C**G**Q**W**L**G**F**D**H**S**Y**A**D**E**C**Y**R**L**W**C**D**S**A**A**I**G**A**Q**S**G**L**Y**I**  
DrPAC1 229 Y**S**D-----V**L**H**P**D**S**A**S**M**Q**M**A**A**T**L**S**S-----V**L**K**L**E**Q**S**L**S**A**D**V**L**O**R**V**T**R**V**S**E**I**Q**S**N**L**Y**T**  
KlPba1 210 Y**N**F**P**-----T**V**D**A**L**V**D**E**M**S**K**L**L**C**S**Y**P---S**Q**T**E**Y**Y**V**S**E**C**L**K**L**W**L**D**E**C**T-T**T**Q**G**G**L**Y**I**  
YlPba1 227 Q**N**V**G**-----T**Q**S**F**E**R**Y**Q**S**D**T**E**D**L**T**G**I**L**A**G**----V**F**G**L**D**A**K**A**L**K**E**L**R**A**D**D**G**V**A-G**L**Y**L**  
UmPba1 222 G**L**G**A**G**Q**P**S**P**A**I**S**E**T**L**S**A**L**T**G**L**D**G**G**K**P**V**A**S**K**G**S**T**L**L**D**F**V**A**S**R**R**V**K**P**A**A**N**L**A**V**L**G**D**G**N**Y**I**

Supplementary Fig. S4. Li et al.

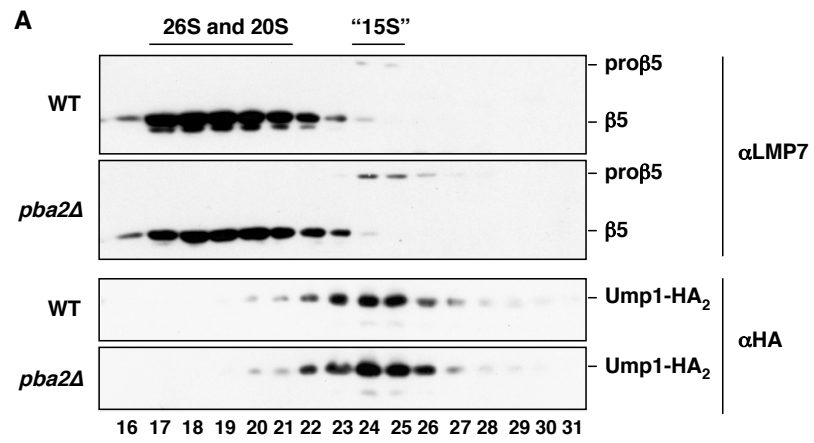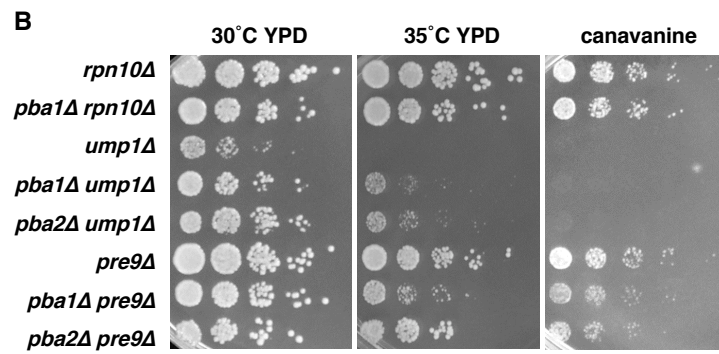

Supplementary Fig. S5. Li et al.
